# Supplementary material
Source: HighWire-hosted journal article supplement (http://molpharm.aspetjournals.org/highwire/filestream/76756/field_highwire_adjunct_files/2/MOL52829_SuppFig3.pdf)

SOD1<sup>wt</sup>

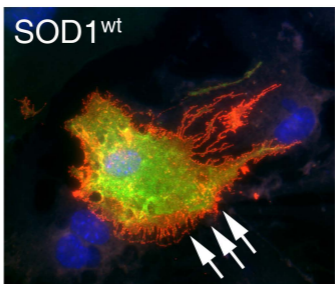

SOD1<sup>G93A</sup>

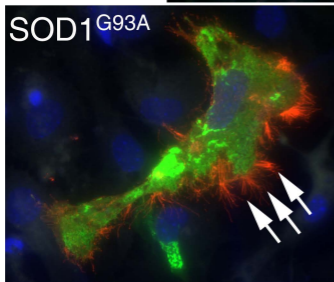

SOD1<sup>G37R</sup>

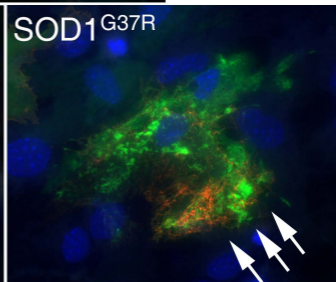

SOD1<sup>G85R</sup>

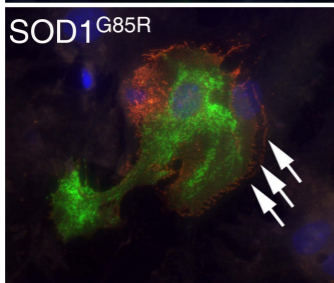

SOD1<sup>A4V</sup>

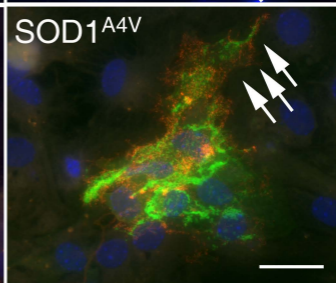

Supplement: MOL52829_SuppFig3.pdf [file MOL52829_SuppFig3.pdf]
